# Supplementary material for: Molybdenum-iron–cobalt oxyhydroxide with rich oxygen vacancies for the oxygen evolution reaction
Source: Royal Society of Chemistry journal article supplement (doi:10.1039/d2nr02568j), 2022-01-01
Supplement: d2nr02568j1.pdf [file d2nr02568j1.pdf]

## Supporting Information

### **Molybdenum-Iron-Cobalt Oxyhydroxide with Rich Oxygen Vacancies for Oxygen Evolution Reaction**

*Yechuan Zhang,<sup>ab, †</sup> Zhengxiang Gu,<sup>a, †</sup> Jingxiu Bi,<sup>b</sup> Yan Jiao<sup>b,\*</sup>*

Y. Zhang, Dr. Z. Gu,

Huaxi MR Research Center (HMRRC), Department of Radiology, State Key Laboratory of Biotherapy, West China Hospital, Sichuan University, Chengdu 610041, China.

E-mail: zxgu16@scu.edu.cn

Y. Zhang, A/Prof. Jingxiu Bi, A/Prof. Y. Jiao,

School of Chemical Engineering and Advanced Materials, University of Adelaide, SA 5005, Australia.

\*E-mail: yan.jiao@adelaide.edu.au

<sup>†</sup>Y. Z. and Z.G. contributed equally to this work.

\*Corresponding author.

## Experimental Section

All materials were of analytical grade and used without further purification.

### Synthesis of $\text{MoO}_x\text{Co}(\text{OH})_{2-x}$

In a typical synthesis, 2 mmol of  $\text{Na}_2\text{MoO}_4 \cdot 2\text{H}_2\text{O}$  and 4 mmol of glucose were dissolved into 50 mL of DI water. The mixture was treated with an intense ultrasonication for a few minutes and then transferred to a 1000 mL Teflon stainless steel autoclave. Afterwards,  $\text{Co}(\text{OH})_2$  nanowires supported was immersed in the reaction solution. The autoclave was sealed and maintained at 150 °C for 6 h and then cooled to room temperature.

### Structure Characterizations

A field emission scanning electron microscopy (FESEM; ZEISS-Merlin), a transmission electron microscopy (TEM, JEOL-2010) with energy dispersive X-ray spectroscopy (EDX), and a high-resolution TEM (HRTEM, JEOL-2010) were used to characterize the morphology and composition of samples. (XRD) curves of samples were recorded on Rigaku at 40 kV and 40 mA, and X-ray photoelectron spectroscopy (XPS) curves are obtained on a PHI Quantera SXM (ULVAC-PHI) instrument to determine the compositions and the valence states of the elements in the samples.

### Electrochemical measurements.

All electrochemical measurements were performed on a CHI 760E electrochemical work station with a typical three-electrode setting at room temperature. A graphite rod and a Hg/HgO electrode were selected as a counter and reference electrode, respectively. The self-supporting array grown on carbon cloth (1×1 cm, mass loading ~ 2.5 mg/cm<sup>2</sup>) was directly used as a working electrode. The electrochemical data were collected in an electrolyte of 1.0 M KOH. The measured potentials via the Hg/HgO electrode were converted to those based on a reversible hydrogen electrode (RHE) by the Nernst equation:  $E(\text{RHE}) = E(\text{Hg}/\text{HgO}) + 0.0591 \cdot \text{pH} + 0.098$ . The overpotential ( $\eta$ ) was calculated according to the following equation:  $\eta = E(\text{RHE}) - 1.23$  V. Linear sweep voltammetry curves for OER were established at a scanning rate of 5 mV/s before 50 cycles of the cyclic voltammetry tests at a scan rate

of 50 mV/s were conducted to obtain stable curves. The Tafel slopes were obtained from the polarization curves by the equation,  $\eta = a + b \log (i)$ . The chronoamperometry was operated to evaluate the stability under different current densities. Electrochemical impedance spectroscopy (EIS) measurements were performed over a frequency range of 0.1-10<sup>6</sup> Hz by applying an AC amplitude of 50 mV. All data presented were within 90% iR-correction.

## Figures

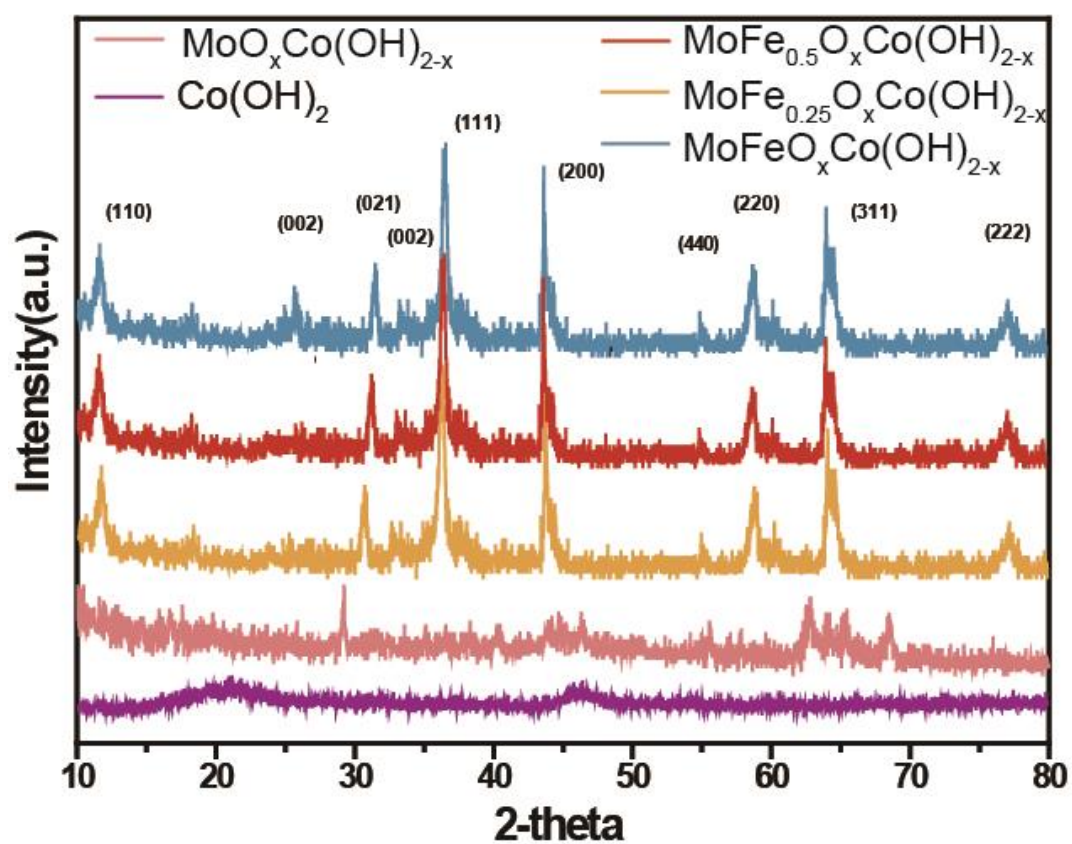

**Figure S1.** (a) XRD patterns of different electrocatalysts.

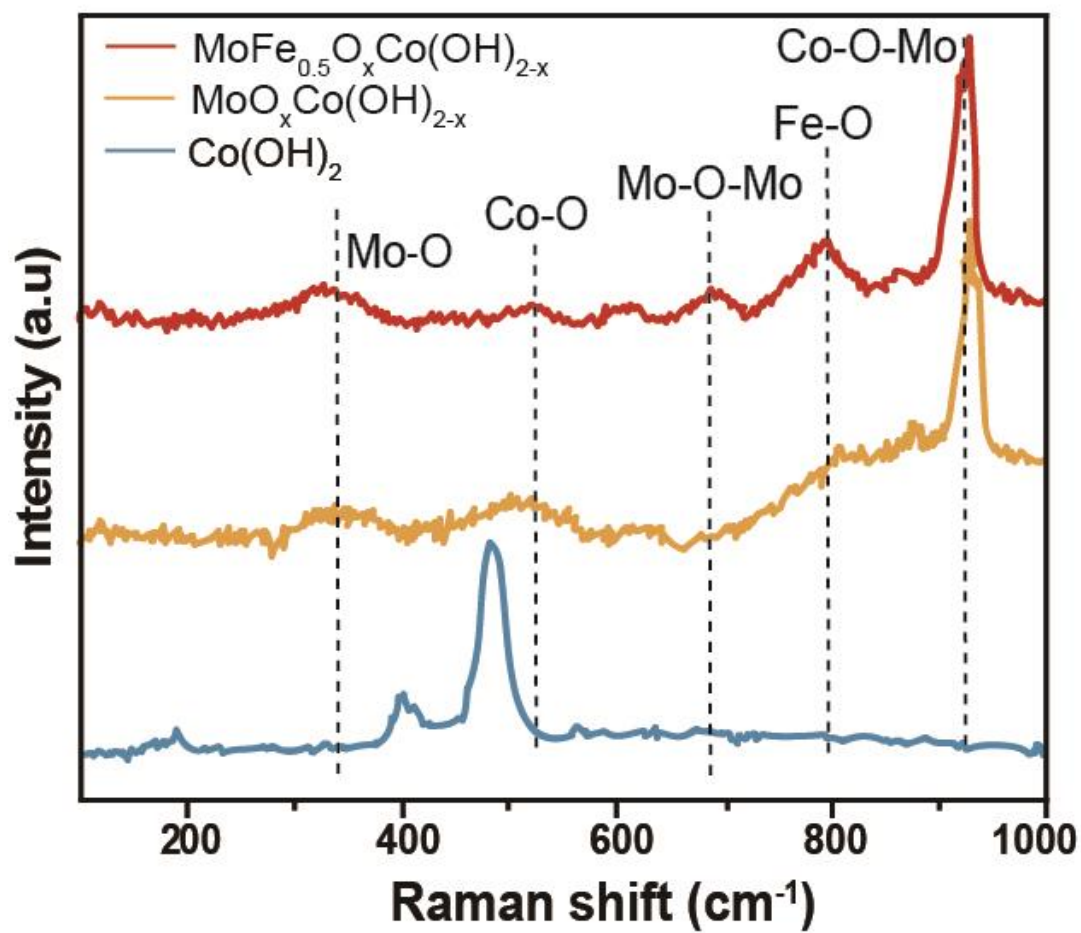

**Figure S2.** (a) Raman spectra of  $\text{MoO}_x\text{Co}(\text{OH})_{2-x}$ ,  $\text{MoFe}_{0.5}\text{O}_x\text{Co}(\text{OH})_{2-x}$ , and  $\text{Co}(\text{OH})_2$  electrocatalysts.

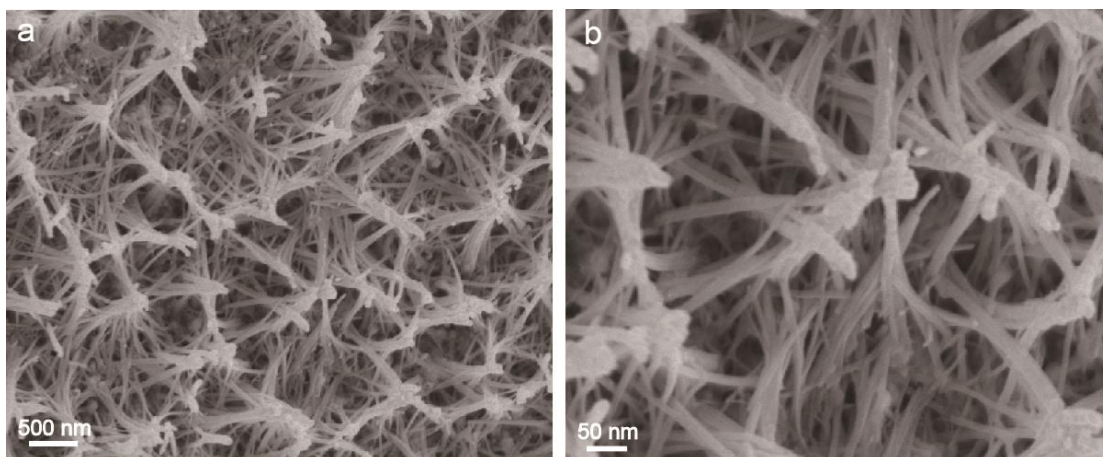

**Figure S3.** (a, b) SEM images of  $\text{Co(OH)}_2$ .

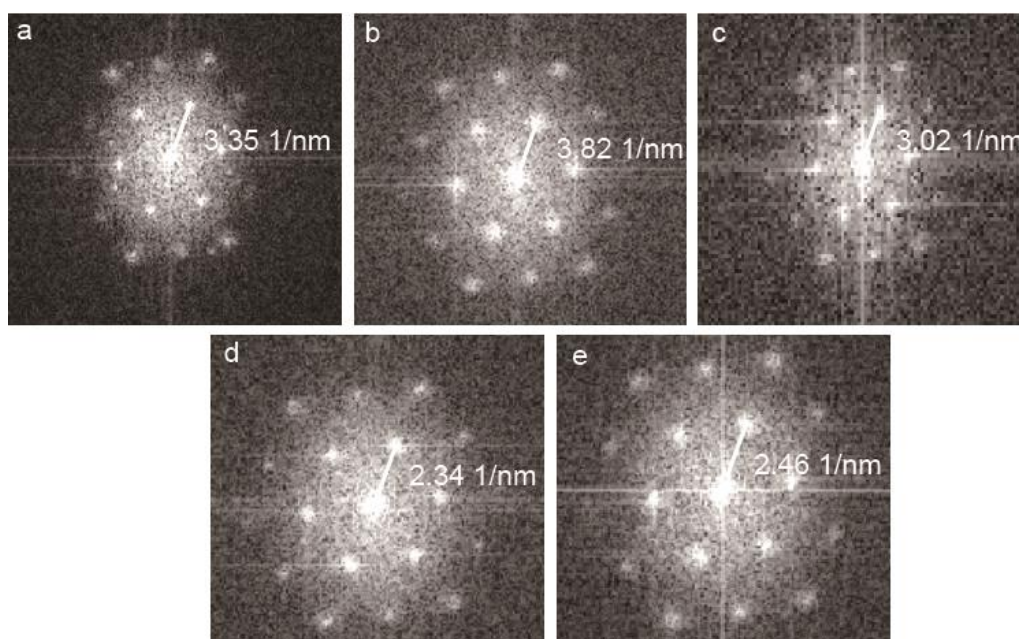

**Figure S4.** Images of Fourier transform corresponding to Fig 2a and 2c that reveal the lattice spacing of  $\text{MoFe}_{0.5}\text{O}_x\text{Co(OH)}_{2-x}$ .

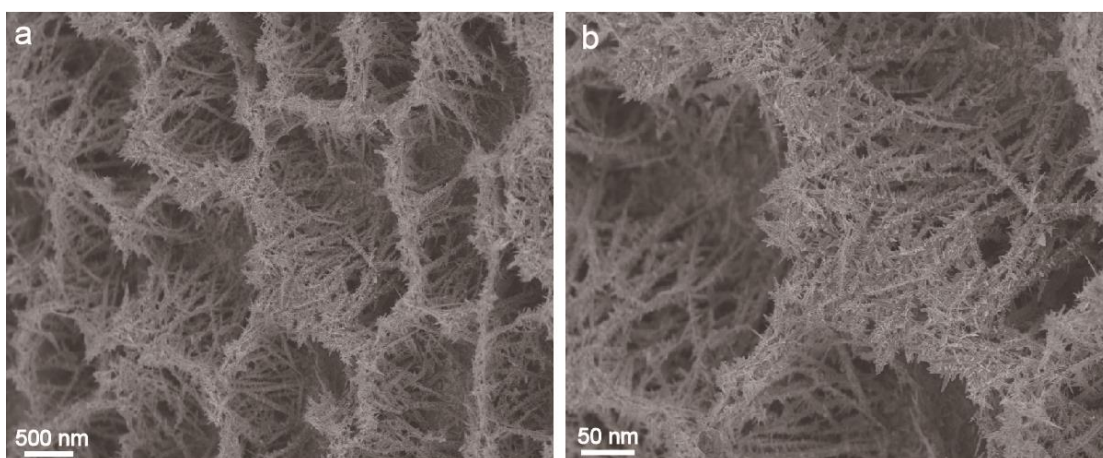

**Figure S5.** (a, b) SEM images of  $\text{MoFe}_{0.5}\text{O}_x\text{Co(OH)}_{2-x}$ .

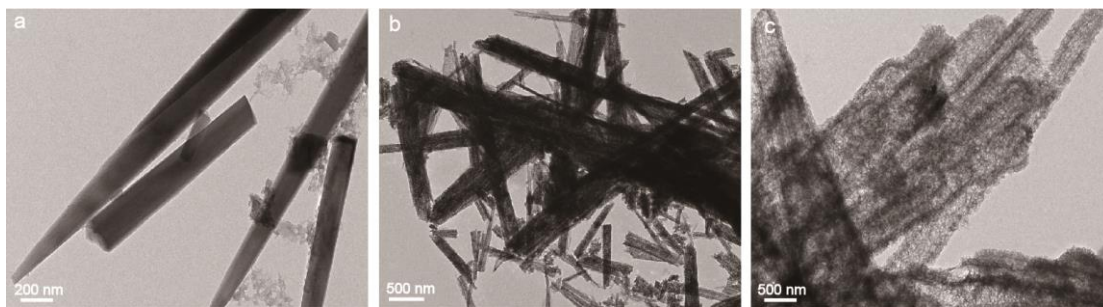

**Figure S6.** TEM images of (a)  $\text{Co(OH)}_2$ , (b)  $\text{MoFeO}_x\text{Co(OH)}_{2-x}$ , (c)  $\text{MoFe}_{0.5}\text{O}_x\text{Co(OH)}_{2-x}$ .

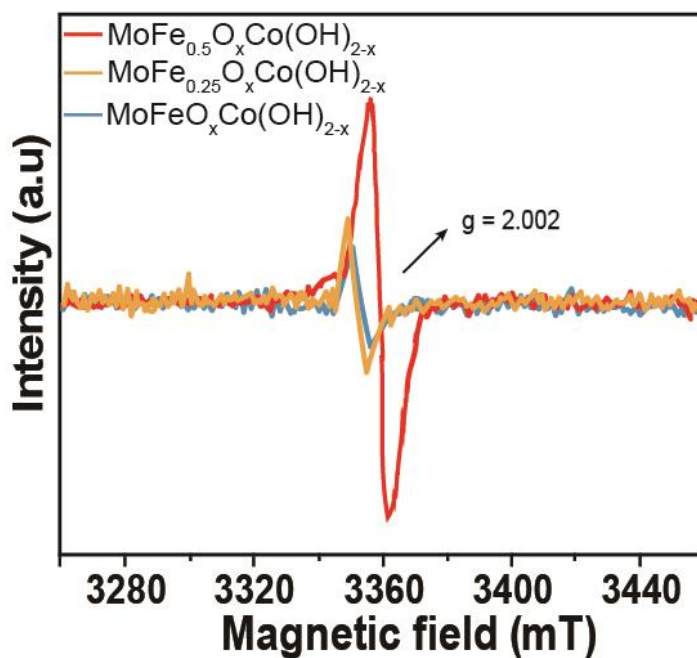

**Figure S7.** EPR spectra of  $\text{MoFeO}_x\text{Co(OH)}_{2-x}$ ,  $\text{MoFe}_{0.25}\text{O}_x\text{Co(OH)}_{2-x}$ , and  $\text{MoFe}_{0.5}\text{O}_x\text{Co(OH)}_{2-x}$ .

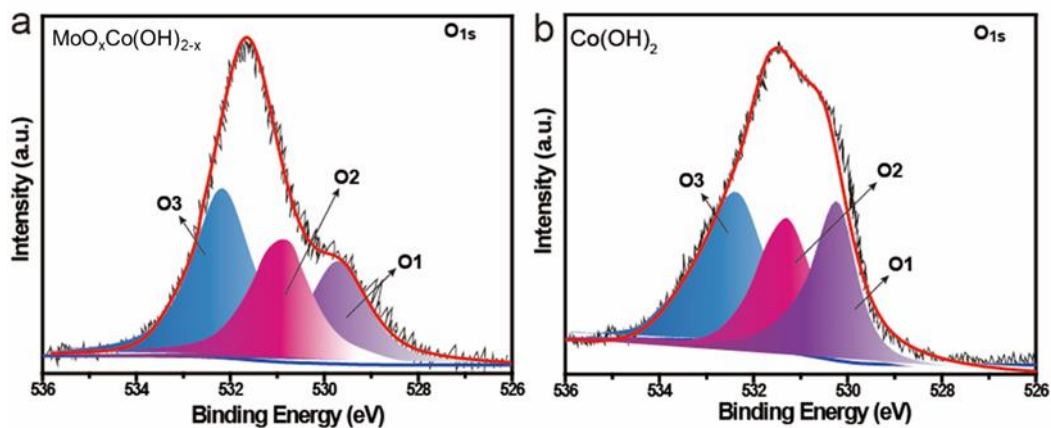

**Figure S8.** O1s XPS of comparative (a)  $\text{MoO}_x\text{Co(OH)}_{2-x}$  and (b)  $\text{Co(OH)}_2$ .

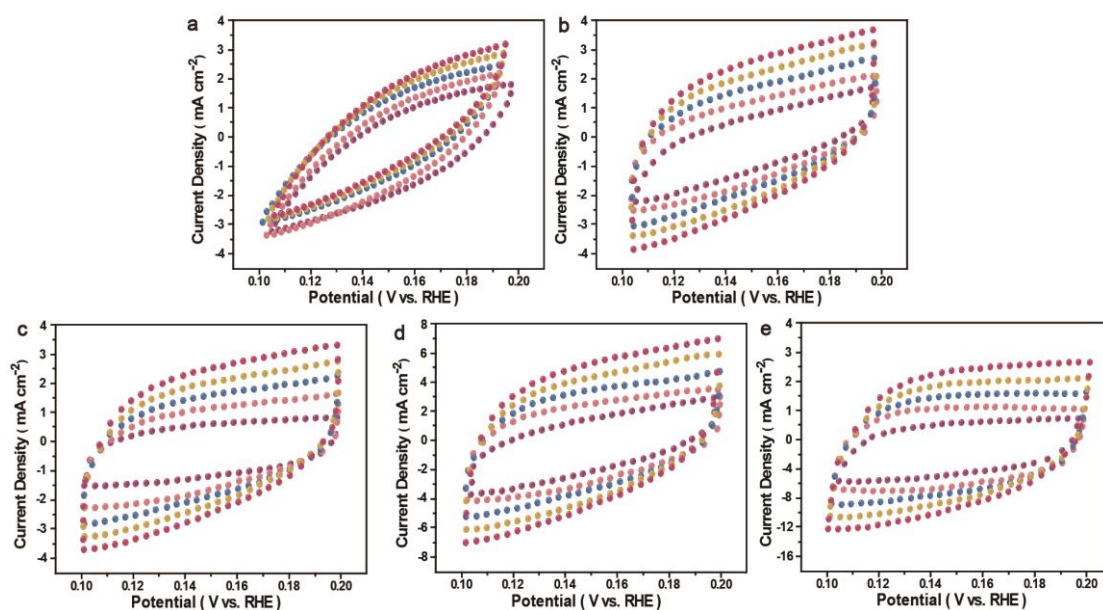

**Figure S9.** (a) CV curves of (a)  $\text{Co}(\text{OH})_2$ , (b)  $\text{MoO}_x\text{Co}(\text{OH})_{2-x}$ , (c)  $\text{MoFe}_{0.25}\text{O}_x\text{Co}(\text{OH})_{2-x}$ , (d)  $\text{MoFe}_{0.5}\text{O}_x\text{Co}(\text{OH})_{2-x}$ , (e)  $\text{MoFeO}_x\text{Co}(\text{OH})_{2-x}$  electrocatalysts at scan rates from 10 to 50  $\text{mV s}^{-1}$ .

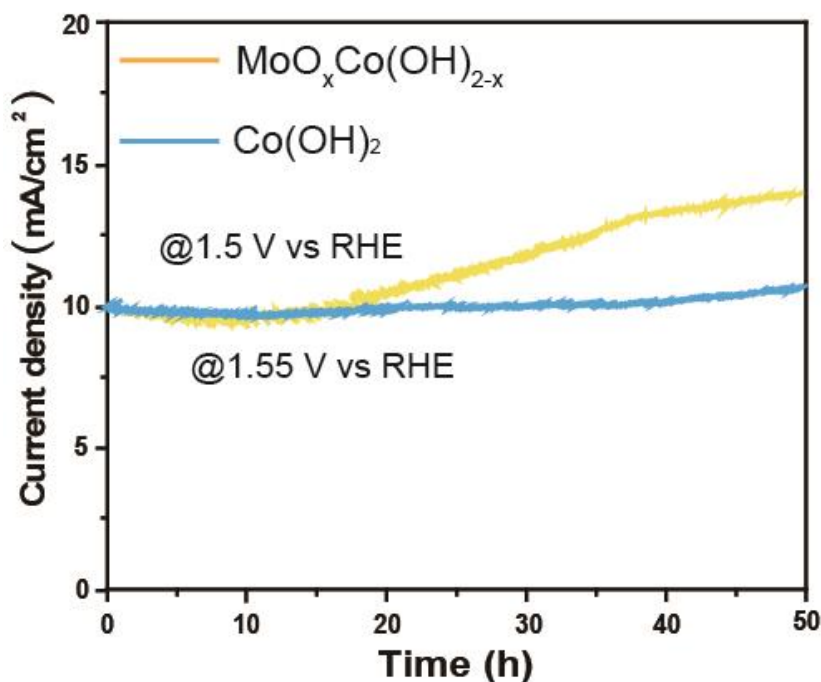

**Figure S10.** Long-term durability test of  $\text{Co}(\text{OH})_2$  and  $\text{MoO}_x\text{Co}(\text{OH})_{2-x}$  at different potentials for OER.

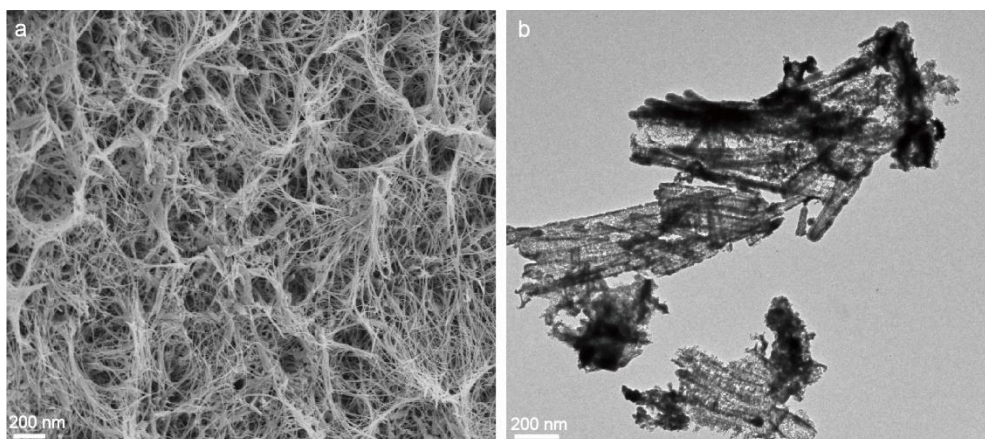

**Figure S11.** (a) SEM image and (b) TEM image of  $\text{MoFe}_{0.5}\text{O}_x\text{Co}(\text{OH})_{2-x}$  after the stability test.

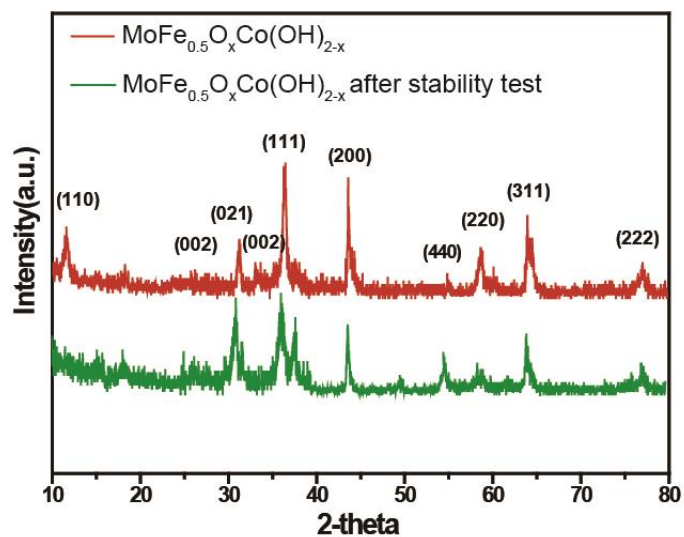

**Figure S12.** XRD pattern of  $\text{MoFe}_{0.5}\text{O}_x\text{Co}(\text{OH})_{2-x}$  before and after the stability test.

**Table S1.** The metallic composition of  $\text{MoO}_x\text{Co}(\text{OH})_{2-x}$ ,  $\text{MoFe}_{0.5}\text{O}_x\text{Co}(\text{OH})_{2-x}$ ,  $\text{MoFe}_{0.25}\text{O}_x\text{Co}(\text{OH})_{2-x}$ , and  $\text{MoFeO}_x\text{Co}(\text{OH})_{2-x}$ , catalyst by ICP-MS. Regardless of oxygen in this characterization.

| Sample                                                   | Co (at.%) | Mo (at.%) | Fe (at.%) |
|----------------------------------------------------------|-----------|-----------|-----------|
| $\text{MoO}_x\text{Co}(\text{OH})_{2-x}$                 | 90.13     | 9.87      | -         |
| $\text{MoFe}_{0.25}\text{O}_x\text{Co}(\text{OH})_{2-x}$ | 88.46     | 9.01      | 2.53      |
| $\text{MoFe}_{0.5}\text{O}_x\text{Co}(\text{OH})_{2-x}$  | 86.97     | 7.51      | 5.52      |
| $\text{MoFeO}_x\text{Co}(\text{OH})_{2-x}$               | 83.61     | 6.21      | 10.18     |

**Table S2.** Comparison of the OER activities of the  $\text{MoFe}_{0.5}\text{O}_x\text{Co}(\text{OH})_{2-x}$  sample in this work with recently-reported catalysts.

| catalysts                                               | Overpotential (mV) | $j / (\text{mA cm}^{-2})$ | Tafel slope ( $\text{mV dec}^{-1}$ ) | Reference        |
|---------------------------------------------------------|--------------------|---------------------------|--------------------------------------|------------------|
| $\text{MoFe}_{0.5}\text{O}_x\text{Co}(\text{OH})_{2-x}$ | <b>223</b>         | <b>10</b>                 | <b>43.6</b>                          | <b>This work</b> |
| CoFeV-LDH                                               | 242                | 10                        | 57                                   | S1               |
| CoMoV-LDH                                               | 270                | 10                        | 106                                  | S2               |
| CoMo hydr(oxy)oxide                                     | 377                | 10                        | 41.88                                | S3               |
| CoFe-LDH                                                | 320                | 10                        | 53                                   | S4               |
| $\text{Fe}_x\text{Co}_{1-x}\text{OOH}$                  | 266                | 10                        | 30.0                                 | S5               |
| Ir-doped $\text{NiV}(\text{OH})_2$                      | 260                | 10                        | 55.3                                 | S6               |
| $\text{NiCo}_{16-x}\text{P}_6$                          | 290                | 10                        | 66                                   | S7               |
| CoP-CeO <sub>2</sub>                                    | 224                | 10                        | 90.3                                 | S8               |
| Pt-Cu@Cu <sub>x</sub> O                                 | 250                | 10                        | 56                                   | S9               |
| NiCoMo                                                  | 304                | 10                        | 56.4                                 | S10              |

## References:

- S1. Y. M. Hu, Z. L. Wang, W. J. Liu, L. Xu, M. L. Guan, Y. P. Huang, Y. Zhao, J. Bao and H. M. Li, *Acs Sustain Chem Eng*, 2019, **7**, 16828-16834.
- S2. J. Bao, Z. L. Wang, J. F. Xie, L. Xu, F. C. Lei, M. L. Guan, Y. Zhao, Y. P. Huang and H. M. Li, *Chem Commun*, 2019, **55**, 3521-3524.
- S3. S. Bera, W. J. Lee, E. K. Koh, C. M. Kim, S. Ghosh, Y. Yang and S. H. Kwon, *J Phys Chem C*, 2020, **124**, 16879-16887.
- S4. Q. Zhou, Y. P. Chen, G. Q. Zhao, Y. Lin, Z. W. Yu, X. Xu, X. L. Wang, H. K. Liu, W. P. Sun and S. X. Dou, *Acs Catal*, 2018, **8**, 5382.
- S5. S. H. Ye, Z. X. Shi, J. X. Feng, Y. X. Tong and G. R. Li, *Angew Chem Int Edit*, 2018, **57**, 2672-2676.
- S6. S. Li, C. Xi, Y. Z. Jin, D. Y. Wu, J. Q. Wang, T. Liu, H. B. Wang, C. K. Dong, H. Liu, S. A. Kulinich and X. W. Du, *Acs Energy Lett*, 2019, **4**, 1823-1829.
- S7. Y. F. Zhao, J. Q. Zhang, Y. H. Xie, B. Sun, J. J. Jiang, W. J. Jiang, S. B. Xi, H. Y. Yang, K. Yan, S. J. Wang, X. Guo, P. Li, Z. J. Han, X. Y. Lu, H. Liu and G. X. Wang, *Nano Lett*, 2021, **21**, 823-832.
- S8. M. Li, X. C. Pan, M. Q. Jiang, Y. F. Zhang, Y. W. Tang and G. T. Fu, *Chem Eng J*, 2020, **395**.
- S9. D. T. Tran, H. T. Le, T. L. L. Doan, N. H. Kim and J. H. Lee, *Nano Energy*, 2019, **59**, 216-228.
- S10. S. Y. Hao, L. C. Chen, C. L. Yu, B. Yang, Z. J. Li, Y. Hou, L. C. Lei and X. W. Zhang, *Acs Energy Lett*, 2019, **4**, 952-959.
